# Supplementary material for: The Interconnectivity and Spatio-Temporal Evolution of Rail Transit Network Based on Multi-Element Flows: A Case Study of Beijing-Tianjin-Hebei Urban Agglomeration, China
Source: MDPI journal article supplement (doi:10.3390/land13020249), 2024-02-18
Supplement: s1 [file s1]

The Values of Rail Transit Interconnectivity Degree of the BTH urban agglomeration in 2010.

| Region       | Beijing | Tianjin | Shijiazhuang | Zhangjiakou | Chengde | Qinhuangdao | Tangshan | Cangzhou | Hengshui | Langfang | Baoding | Xingtai | Handan | Dingzhou | Xinji  | An Yang |
|--------------|---------|---------|--------------|-------------|---------|-------------|----------|----------|----------|----------|---------|---------|--------|----------|--------|---------|
| Beijing      |         | 19.056  | 1.529        | 2.870       | 2.274   | 0.000       | 2.437    | 2.238    | 2.002    | 20.995   | 6.175   | 0.000   | 0.000  | 3.801    | 1.272  | 0.000   |
| Tianjin      | 15.350  |         | 1.164        | 0.000       | 0.000   | 1.800       | 3.586    | 5.322    | 0.000    | 17.508   | 2.606   | 0.000   | 0.000  | 1.268    | 0.000  | 0.000   |
| Shijiazhuang | 1.070   | 1.011   |              | 0.000       | 0.000   | 0.000       | 0.000    | 0.000    | 3.755    | 0.000    | 3.437   | 4.529   | 3.424  | 3.360    | 9.772  | 1.371   |
| Zhangjiakou  | 1.272   | 0.000   | 0.000        |             | 0.000   | 0.000       | 0.000    | 0.000    | 0.000    | 0.000    | 0.000   | 0.000   | 0.000  | 0.000    | 0.000  | 0.000   |
| Chengde      | 1.096   | 0.000   | 0.000        | 0.000       |         | 0.000       | 0.000    | 0.000    | 0.000    | 0.000    | 0.000   | 0.000   | 0.000  | 0.000    | 0.000  | 0.000   |
| Qinhuangdao  | 0.000   | 1.392   | 0.000        | 0.000       | 0.000   |             | 1.911    | 0.000    | 0.000    | 0.000    | 0.000   | 0.000   | 0.000  | 0.000    | 0.000  | 0.000   |
| Tangshan     | 1.518   | 2.773   | 0.000        | 0.000       | 0.000   | 1.909       |          | 0.801    | 0.000    | 0.875    | 0.000   | 0.000   | 0.000  | 0.000    | 0.000  | 0.000   |
| Cangzhou     | 1.190   | 3.513   | 0.000        | 0.000       | 0.000   | 0.000       | 0.000    |          | 0.000    | 1.953    | 0.000   | 0.000   | 0.000  | 0.000    | 0.000  | 0.000   |
| Hengshui     | 1.097   | 0.000   | 2.943        | 0.000       | 0.000   | 0.000       | 0.000    | 0.000    |          | 0.000    | 0.000   | 0.000   | 0.000  | 0.000    | 14.664 | 0.000   |
| Langfang     | 12.343  | 12.778  | 0.000        | 0.000       | 0.000   | 0.000       | 0.826    | 2.159    | 0.000    |          | 0.000   | 0.000   | 0.000  | 0.000    | 0.000  | 0.000   |
| Baoding      | 4.178   | 2.189   | 3.324        | 0.000       | 0.000   | 0.000       | 0.000    | 0.000    | 0.000    | 0.000    |         | 1.029   | 0.923  | 15.337   | 0.858  | 0.000   |
| Xingtai      | 0.000   | 0.000   | 3.853        | 0.000       | 0.000   | 0.000       | 0.000    | 0.000    | 0.000    | 0.000    | 0.905   |         | 14.188 | 1.224    | 0.000  | 4.106   |
| Handan       | 0.000   | 0.000   | 3.391        | 0.000       | 0.000   | 0.000       | 0.000    | 0.000    | 0.000    | 0.000    | 0.946   | 16.516  |        | 1.070    | 0.000  | 14.873  |
| Dingzhou     | 2.460   | 1.018   | 3.108        | 0.000       | 0.000   |             | 0.000    | 0.000    | 0.000    | 0.000    | 14.670  | 1.331   | 0.999  |          | 1.585  | 0.000   |
| Xinji        | 0.000   | 0.000   | 7.116        | 0.000       | 0.000   | 0.000       | 0.000    | 0.000    | 13.627   | 0.000    | 0.000   | 0.000   | 0.000  | 1.248    |        | 0.000   |
| Anyang       | 0.000   | 0.000   | 1.145        | 0.000       | 0.000   | 0.000       | 0.000    | 0.000    | 0.000    | 0.000    | 0.000   | 4.029   | 12.536 | 0.000    | 0.000  |         |

The Values of Rail Transit Interconnectivity Degree of the BTH urban agglomeration in 2014.

| Region       | Beijing | Tianjin | Shijiazhuang | Zhangjiakou | Chengde | Qinhuangdao | Tangshan | Cangzhou | Hengshui | Langfang | Baoding | Xingtai | Handan | Dingzhou | Xinji  | An Yang |
|--------------|---------|---------|--------------|-------------|---------|-------------|----------|----------|----------|----------|---------|---------|--------|----------|--------|---------|
| Beijing      |         | 27.472  | 2.211        | 4.555       | 3.464   | 1.100       | 3.561    | 3.294    | 3.113    | 31.857   | 8.974   | 1.041   | 0.967  | 6.269    | 1.932  | 0.000   |
| Tianjin      | 20.050  |         | 1.383        | 0.000       | 0.000   | 2.177       | 4.302    | 6.430    | 0.000    | 21.809   | 3.109   | 0.000   | 0.000  | 1.716    | 0.000  | 0.000   |
| Shijiazhuang | 1.407   | 1.205   |              | 0.000       | 0.000   | 0.000       | 0.000    | 0.000    | 4.828    | 0.000    | 4.129   | 5.705   | 4.714  | 4.580    | 12.264 | 1.668   |
| Zhangjiakou  | 2.014   | 0.000   | 0.000        |             | 0.000   | 0.000       | 0.000    | 0.000    | 0.000    | 0.000    | 0.000   | 0.000   | 0.000  | 0.000    | 0.000  | 0.000   |
| Chengde      | 1.598   | 0.000   | 0.000        | 0.000       |         | 0.000       | 0.000    | 0.000    | 0.000    | 0.000    | 0.000   | 0.000   | 0.000  | 0.000    | 0.000  | 0.000   |
| Qinhuangdao  | 0.000   | 1.721   | 0.000        | 0.000       | 0.000   |             | 2.394    | 0.000    | 0.000    | 0.000    | 0.000   | 0.000   | 0.000  | 0.000    | 0.000  | 0.000   |
| Tangshan     | 2.038   | 3.373   | 0.000        | 0.000       | 0.000   | 2.374       |          | 0.995    | 0.000    | 1.120    | 0.000   | 0.000   | 0.000  | 0.000    | 0.000  | 0.000   |
| Cangzhou     | 1.620   | 4.332   | 0.000        | 0.000       | 0.000   | 0.000       | 0.855    |          | 0.923    | 2.535    | 0.000   | 0.000   | 0.000  | 0.000    | 0.000  | 0.000   |
| Hengshui     | 1.669   | 0.000   | 4.068        | 0.000       | 0.000   | 0.000       | 0.000    | 1.006    |          | 0.000    | 0.829   | 1.008   | 0.000  | 1.031    | 21.276 | 0.000   |
| Langfang     | 17.861  | 16.753  | 0.000        | 0.000       | 0.000   | 0.000       | 1.098    | 2.890    | 0.000    |          | 0.852   | 0.000   | 0.000  | 0.000    | 0.000  | 0.000   |
| Baoding      | 5.546   | 2.632   | 4.012        | 0.000       | 0.000   | 0.000       | 0.000    | 0.000    | 0.955    | 0.939    |         | 1.308   | 1.283  | 21.103   | 1.086  | 0.000   |
| Xingtai      | 0.000   | 0.000   | 5.114        | 0.000       | 0.000   | 0.000       | 0.000    | 0.000    | 1.072    | 0.000    | 1.207   |         | 21.681 | 1.852    | 1.082  | 5.547   |
| Handan       | 0.000   | 0.000   | 5.375        | 0.000       | 0.000   | 0.000       | 0.000    | 0.000    | 0.953    | 0.000    | 1.506   | 27.582  |        | 1.933    | 1.136  | 23.991  |
| Dingzhou     | 4.205   | 1.577   | 4.830        | 0.000       | 0.000   | 0.000       | 0.000    | 0.000    | 1.291    | 0.000    | 22.907  | 2.179   | 1.788  |          | 2.586  | 0.969   |
| Xinji        | 0.939   | 0.000   | 9.373        | 0.000       | 0.000   | 0.000       | 0.000    | 0.000    | 19.300   | 0.000    | 0.855   | 1.000   | 0.000  | 1.874    |        | 0.000   |
| Anyang       | 0.000   | 0.000   | 1.417        | 0.000       | 0.000   | 0.000       | 0.000    | 0.000    | 0.000    | 0.000    | 0.000   | 5.257   | 17.873 | 0.000    | 0.000  |         |

The Values of Rail Transit Interconnectivity Degree of the BTH urban agglomeration in 2018.

| Region       | Beijing | Tianjin | Shijiazhuang | Zhangjiakou | Chengde | Qinhuangdao | Tangshan | Cangzhou | Hengshui | Langfang | Baoding | Xingtai | Handan | Dingzhou | Xinji  | An Yang |
|--------------|---------|---------|--------------|-------------|---------|-------------|----------|----------|----------|----------|---------|---------|--------|----------|--------|---------|
| Beijing      |         | 40.073  | 3.244        | 7.520       | 5.164   | 1.563       | 5.155    | 5.014    | 4.316    | 49.375   | 12.508  | 1.515   | 1.180  | 7.809    | 2.928  | 1.093   |
| Tianjin      | 31.600  |         | 2.368        | 0.983       | 0.000   | 3.612       | 7.270    | 11.424   | 1.170    | 39.457   | 5.058   | 0.893   | 0.940  | 2.496    | 0.000  | 0.000   |
| Shijiazhuang | 2.242   | 2.075   |              | 0.000       | 0.000   | 0.000       | 0.000    | 0.993    | 7.902    | 0.000    | 6.794   | 9.801   | 6.791  | 6.736    | 21.944 | 2.864   |
| Zhangjiakou  | 4.067   | 0.000   | 0.000        |             | 0.000   | 0.000       | 0.000    | 0.000    | 0.000    | 0.799    | 0.000   | 0.000   | 0.000  | 0.000    | 0.000  | 0.000   |
| Chengde      | 2.631   | 0.000   | 0.000        |             |         | 0.000       | 0.000    | 0.000    | 0.000    | 0.000    | 0.000   | 0.000   | 0.000  | 0.000    | 0.000  | 0.000   |
| Qinhuangdao  | 0.950   | 2.785   | 0.000        | 0.000       | 0.000   |             | 3.844    | 0.000    | 0.000    | 0.000    | 0.000   | 0.000   | 0.000  | 0.000    | 0.000  | 0.000   |
| Tangshan     | 3.163   | 5.656   | 0.000        | 0.000       | 0.000   | 3.880       |          | 1.740    | 0.000    | 1.996    | 1.103   | 0.000   | 0.000  | 0.000    | 0.000  | 0.000   |
| Cangzhou     | 2.780   | 8.032   | 0.797        | 0.000       | 0.000   | 0.000       | 1.573    |          | 1.627    | 4.993    | 0.973   | 0.000   | 0.000  | 0.000    | 1.445  | 0.000   |
| Hengshui     | 2.376   | 0.817   | 6.293        | 0.000       | 0.000   | 0.000       | 0.000    | 1.615    |          | 0.000    | 1.218   | 1.547   | 0.906  | 1.355    | 34.012 | 0.000   |
| Langfang     | 31.779  | 32.205  | 0.000        | 0.951       | 0.000   | 0.000       | 2.094    | 5.797    | 0.895    |          | 1.564   | 0.000   | 0.000  | 0.988    | 0.000  | 0.000   |
| Baoding      | 7.981   | 4.092   | 6.272        | 0.000       | 0.000   | 0.000       | 1.147    | 1.120    | 1.412    | 1.551    |         | 2.029   | 1.669  | 28.019   | 1.755  | 0.958   |
| Xingtai      | 0.931   | 0.000   | 8.716        | 0.000       | 0.000   | 0.000       | 0.000    | 0.000    | 1.727    | 0.000    | 1.954   |         | 30.741 | 2.681    | 1.906  | 9.371   |
| Handan       | 0.000   | 0.000   | 6.443        | 0.000       | 0.000   | 0.000       | 0.000    | 0.000    | 1.080    | 0.000    | 1.715   | 32.798  |        | 1.968    | 1.407  | 28.509  |
| Dingzhou     | 4.834   | 1.959   | 6.033        | 0.000       | 0.000   | 0.000       | 0.000    | 0.000    | 1.524    | 0.950    | 27.185  | 2.700   | 1.858  |          | 3.337  | 1.199   |
| Xinji        | 1.598   | 0.000   | 17.330       | 0.000       | 0.000   | 0.000       | 0.000    | 1.423    | 33.729   | 0.000    | 1.501   | 1.693   | 1.171  | 2.942    |        | 0.790   |
| Anyang       | 0.000   | 0.000   | 2.412        | 0.000       | 0.000   | 0.000       | 0.000    | 0.000    | 0.000    | 0.000    | 0.000   | 8.875   | 25.307 | 1.128    | 0.842  |         |

The Values of Rail Transit Interconnectivity Degree of the BTH urban agglomeration in 2021.

| Region       | Beijing | Tianjin | Shijia<br>Zhuang | Zhangjiakou | Chengde | Qinhuangdao | Tangshan | Cangzhou | Hengshui | Langfang | Baoding | Xingtai | Handan | Ding<br>Zhou | Xinji  | An<br>Yang |
|--------------|---------|---------|------------------|-------------|---------|-------------|----------|----------|----------|----------|---------|---------|--------|--------------|--------|------------|
| Beijing      |         | 37.177  | 3.281            | 7.486       | 5.331   | 1.505       | 5.134    | 4.979    | 4.390    | 48.378   | 12.838  | 1.431   | 1.144  | 7.620        | 3.010  | 1.079      |
| Tianjin      | 30.826  |         | 2.648            | 1.083       | 0.871   | 3.846       | 8.006    | 12.543   | 1.316    | 42.747   | 5.740   | 1.000   | 1.007  | 2.693        | 0.000  | 0.000      |
| Shijiazhuang | 2.599   | 2.530   |                  | 0.000       | 0.000   | 0.000       | 0.853    | 1.296    | 10.561   | 0.838    | 9.164   | 12.172  | 8.647  | 8.637        | 29.637 | 3.716      |
| Zhangjiakou  | 4.568   | 0.797   | 0.000            |             | 0.000   | 0.000       | 0.000    | 0.000    | 0.000    | 1.000    | 0.000   | 0.000   | 0.000  | 0.000        | 0.000  | 0.000      |
| Chengde      | 3.180   | 0.000   | 0.000            | 0.000       |         | 0.000       | 0.000    | 0.000    | 0.000    | 0.000    | 0.000   | 0.000   | 0.000  | 0.000        | 0.000  | 0.000      |
| Qinhuangdao  | 1.000   | 3.076   | 0.000            | 0.000       | 0.000   |             | 4.559    | 0.815    | 0.000    | 0.000    | 0.000   | 0.000   | 0.000  | 0.000        | 0.000  | 0.000      |
| Tangshan     | 3.556   | 6.687   | 0.000            | 0.000       | 0.000   | 4.760       |          | 2.202    | 1.010    | 2.492    | 1.442   | 0.000   | 0.000  | 1.000        | 0.847  | 0.000      |
| Cangzhou     | 3.106   | 9.438   | 1.021            | 0.000       | 0.000   | 0.000       | 1.984    |          | 2.095    | 6.197    | 1.265   | 0.000   | 0.000  | 0.000        | 1.881  | 0.000      |
| Hengshui     | 2.785   | 1.007   | 8.458            | 0.000       | 0.000   | 0.000       | 1.000    | 2.131    |          | 1.000    | 1.661   | 1.942   | 1.167  | 1.757        | 40.214 | 0.000      |
| Langfang     | 34.580  | 36.850  | 0.000            | 1.167       | 1.000   | 0.000       | 2.572    | 7.100    | 1.122    |          | 1.980   | 0.000   | 0.000  | 1.189        | 0.888  | 0.000      |
| Baoding      | 9.529   | 5.138   | 8.585            | 0.000       | 0.000   | 0.000       | 1.546    | 1.505    | 1.943    | 2.056    |         | 2.594   | 2.188  | 37.002       | 2.441  | 1.281      |
| Xingtai      | 0.942   | 0.000   | 10.114           | 0.000       | 0.000   | 0.000       | 0.000    | 0.000    | 2.015    | 0.000    | 2.301   |         | 34.175 | 3.001        | 2.247  | 10.615     |
| Handan       | 0.824   | 0.874   | 7.860            | 0.000       | 0.000   | 0.000       | 0.000    | 0.000    | 1.325    | 0.000    | 2.123   | 37.385  |        | 2.316        | 1.744  | 33.950     |
| Dingzhou     | 5.217   | 2.223   | 7.464            | 0.000       | 0.000   | 0.000       | 1.000    | 0.000    | 1.896    | 1.139    | 34.130  | 3.121   | 2.202  |              | 4.195  | 1.448      |
| Xinji        | 1.914   | 0.000   | 23.784           | 0.000       | 0.000   | 0.000       | 0.000    | 1.917    | 38.424   | 0.000    | 2.091   | 2.171   | 1.540  | 3.896        |        | 1.058      |
| Anyang       | 0.000   | 0.000   | 3.055            | 0.000       | 0.000   | 0.000       | 0.000    | 0.000    | 0.800    | 0.000    | 1.124   | 10.503  | 30.707 | 1.378        | 1.084  |            |
